# Supplementary material for: Protection of gut microbiome from antibiotics: development of a vancomycin-specific adsorbent with high adsorption capacity
Source: PubMed Central journal article supplement — Biosci Microbiota Food Health. 2020 Feb 29;39(3):128–36. doi: 10.12938/bmfh.2020-002 (PMC7392918; doi:10.12938/bmfh.2020-002), 2020-02-29
Supplement: bmfh-39-128-s001.pdf [file bmfh-39-128-s001.pdf]

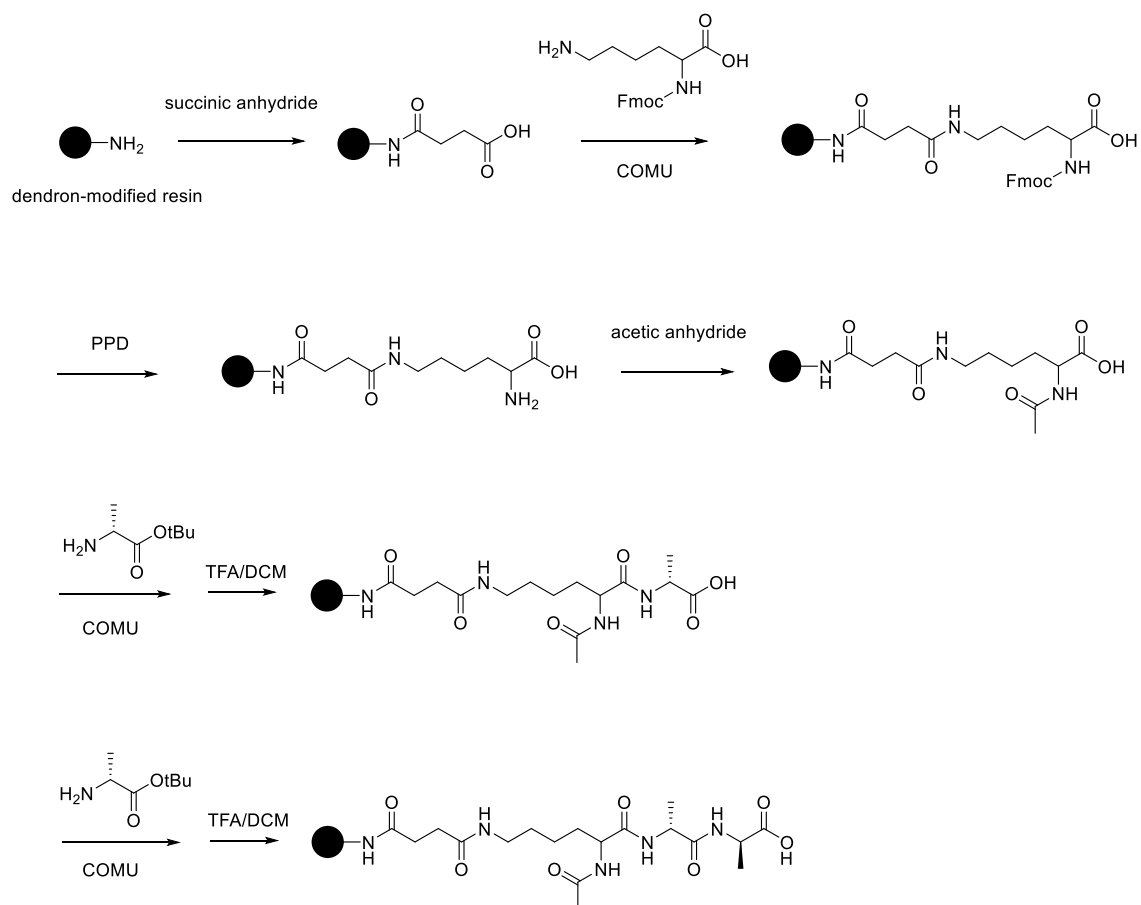

**Supplementary Scheme 1.** Synthesis of ligand from the termini of  $\alpha$ - and  $\epsilon$ -amine groups of *D*-lysine dendrons modified on NovaPEG amino resin.

**Supplementary Table 1.** Sequences of primers for 16S rDNA amplification

---

Sequence (5'-3')

---

Forward TCGTCGGCAGCGTCAGATGTGTATAAGAGACAGGTGCCAGCMGCCGCGGTAA

Reverse GTCTCGTGGGCTCGGAGATGTGTATAAGAGACAGGGACTACHVGGGTWTCTAAT

---

M: A or C.

H: A, T or C.

V: A, G or C.

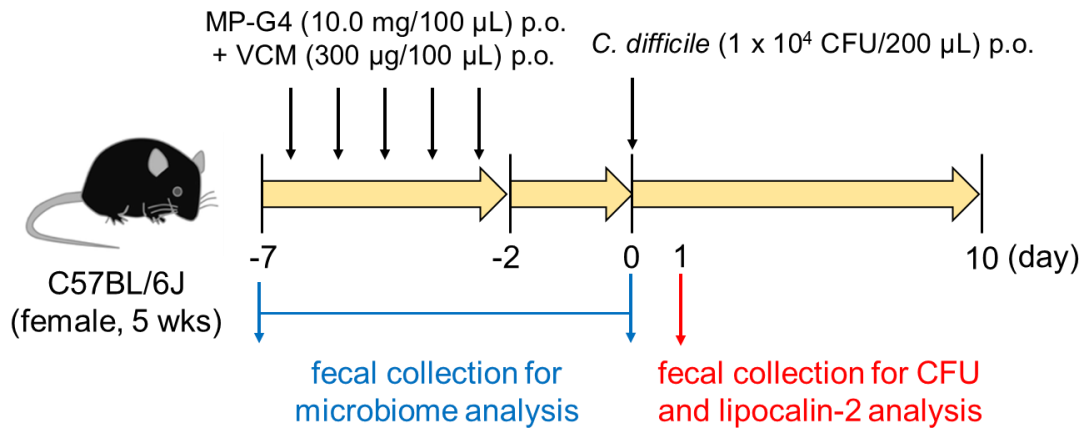

**Supplementary Fig. 1.** Procedure for the animal experiment to examine gut microbiome protection and protection from CDI. C57BL/6J WT mice were divided into four groups (n=6 per group) and were administered DPBS or MP-G4 (10.0 mg/100 µL DPBS(-), and after 1 h, either sterile water or vancomycin (300 µg/100 µL sterile water) by oral gavage for 5 days (= treatment period). Following the treatment period, mice were allowed to drink normal water for 2 days, and the next day, mice were challenged with *C. difficile* spores  $1 \times 10^4$  CFU by oral gavage.



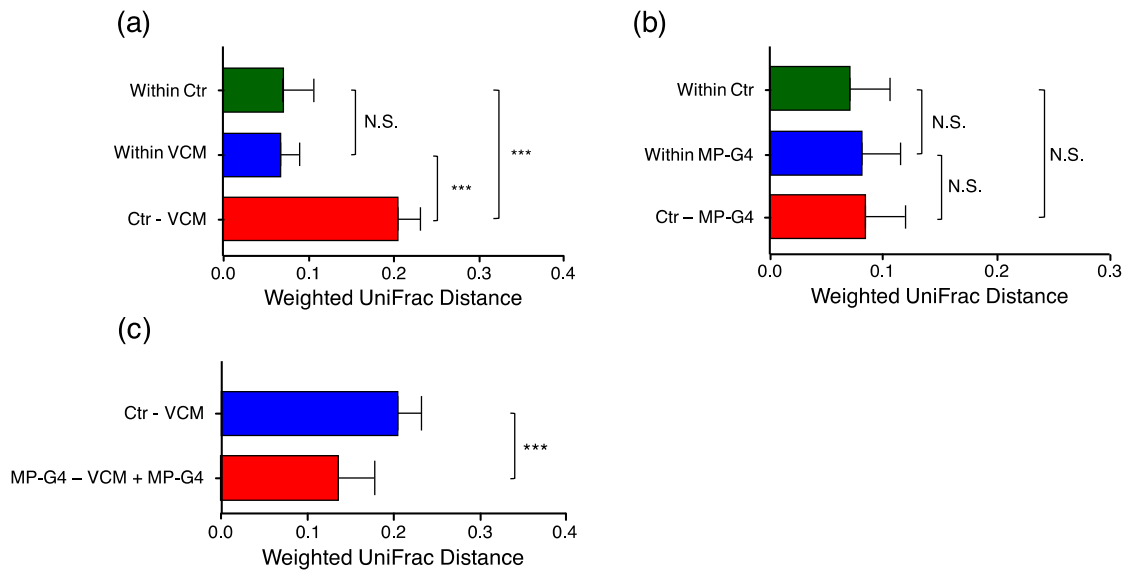

**Supplementary Fig. 3.** Intra- and inter-group  $\beta$ -diversity analysis on day 0. Weighted UniFrac distance metric in the water (Ctr) and VCM-treated groups (a), Ctr and MP-G4-treated groups (b) and between Ctr to VCM-treated groups and MP-G4 to VCM with MP-G4-treated groups (c). Mean ( $\pm$  SD) pairwise weighted UniFrac distances shown. \*\*\* $p < 0.001$ .

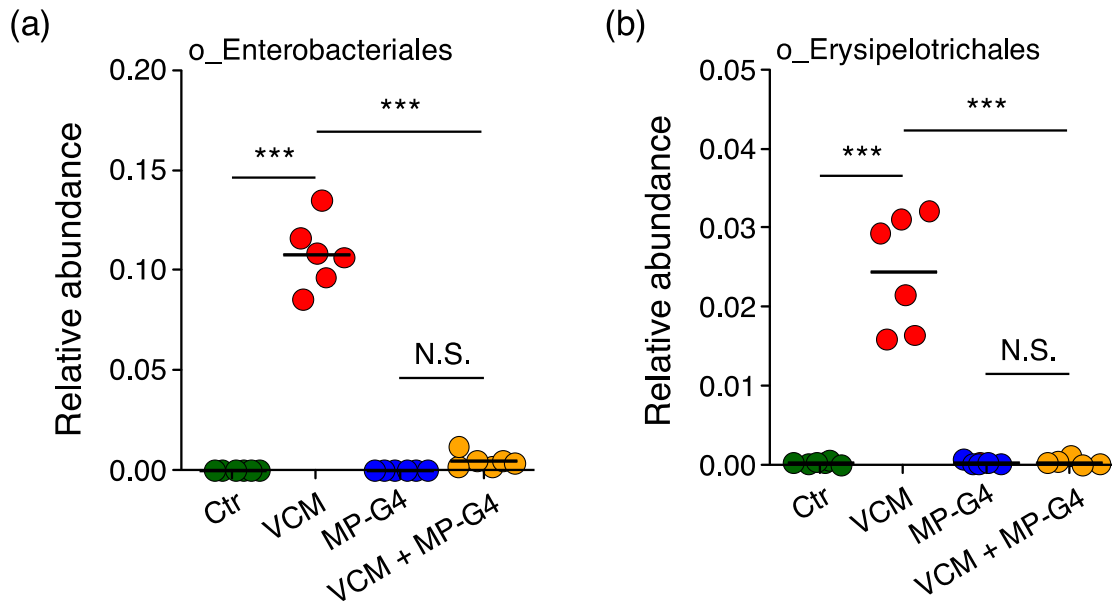

**Supplementary Fig. 4.** The relative abundance of Enterobacteriales (a) and Erysipelotrichales (b) in feces from mice orally treated with water (Ctr), VCM, MP-G4, or VCM with MP-G4 on day 0 (n=6 per group). Each dot represents an individual mouse. \*\*\*p<0.001.
